# Supplementary material for: Validation of the Standardized Needs Evaluation Questionnaire in Polish Cancer Patients
Source: MDPI journal article supplement (doi:10.3390/cancers16081451), 2024-04-09
Supplement: s1 [file s1]

## ZGODA NA UCZESTNICTWO W BADANIU

Świadomie i dobrowolnie wyrażam zgodę na uczestnictwo w badaniu pt.: „Walidacja standaryzowanego kwestionariusza ankietowego NEQ (Needs Evaluation Questionnaire) w polskiej populacji pacjentów z chorobą nowotworową, analiza jakościowa i ilościowa potrzeb pozamedycznych pacjentów”.

Wyrażam zgodę na wykorzystanie uzyskanych informacji do celów naukowych i ewentualnej publikacji.

Udział w badaniu jest anonimowy. Żadne dane osobowe nie zostaną ujawnione. Ochrona danych osobowych zgodnie z Ustawą z dnia 10 maja 2018 r. o ochronie danych osobowych.

.....  
Data

.....  
Podpis badanego

.....  
Data

.....  
Podpis osoby informującej
