# Supplementary material for: Validation of the Standardized Needs Evaluation Questionnaire in Polish Cancer Patients
Source: MDPI journal article supplement (doi:10.3390/cancers16081451), 2024-04-09
Supplement: s1 [file s1]

Suppl. 4. English version of Validation Procedure Questionnaire

VALIDATION No .....

**I. Time of completion the questionnaire**

1. main questionnaire: ..... minutes
2. demographics: ..... minutes

**II. Comprehensibility and acceptability of the questionnaire**

1. Is the form of the questionnaire good in your opinion?  
☐ Yes  
☐ No
2. Is the font size big enough in your opinion?  
☐ Yes  
☐ No
3. Do you think that the questionnaire is sufficiently long?  
☐ Yes  
☐ No – should be shorter  
☐ No – should be longer
4. Are the questions generally understandable in your opinion?  
☐ Yes  
☐ No
5. Are any questions difficult for you to answer clearly?  
☐ Yes  
Which? Number of question .....  
☐ No
6. Are any questions you do not want to answer?  
☐ Yes  
Which? Number of question .....  
☐ No
7. Is there anything else you would like to tell about your needs?  
☐ Yes  
What?.....  
☐ No
8. Do you think that completing this questionnaire may facilitate better contact with the doctor / nurse / other staff?

☐ Yes

☐ No

9. Did you identify any important needs, which you did not recognize before the questionnaire?

☐ Yes

What?.....

Number of question .....

☐ No
