# Supplementary material for: Validation of the Standardized Needs Evaluation Questionnaire in Polish Cancer Patients
Source: MDPI journal article supplement (doi:10.3390/cancers16081451), 2024-04-09
Supplement: s1 [file s1]

WALIDACJA Nr .....

**I. Czas wypełniania ankiety**

1. właściwej ankiety: ..... minut
2. metryczki: ..... minut

**II. Zrozumiałość, akceptowalność ankiety**

1. Czy forma ankiety jest według Pani/Pana dobra?  
☐ Tak  
☐ Nie
2. Czy wielkość liter jest według Pani/Pana wystarczająco duża?  
☐ Tak  
☐ Nie
3. Czy sądzi Pani/Pan, że ankieta jest odpowiednio długa?  
☐ Tak  
☐ Nie – powinna być krótsza  
☐ Nie – powinna być dłuższa
4. Czy pytania są według Pani/Pana generalnie zrozumiałe?  
☐ Tak  
☐ Nie
5. Czy były pytania, na które trudno było Pani/Panu odpowiedzieć jednoznacznie?  
☐ Tak  
Które? Nr Pytania.....  
☐ Nie
6. Czy były pytania, na które Pani/Pan nie mieli ochoty odpowiadać?  
☐ Tak  
Które? Nr Pytania.....  
☐ Nie
7. Czy jest coś jeszcze, o czym Pani/Pan chciałby powiedzieć odnośnie swoich potrzeb?  
☐ Tak  
Co takiego?.....  
☐ Nie
8. Czy myśli/sądzi Pani/Pan, że wypełnienie takiej ankiety może pomóc w lepszym kontakcie z lekarzem/pielęgniarką/innym personelem?  
☐ Tak

☐ Nie

9. Czy dzięki tej ankiecie zauważyła Pani/Pan coś ważnego, na co wcześniej nie zwracała Pani/Pan uwagi?

☐ Tak

Co takiego?.....

Ewentualnie Nr Pytania .....

☐ Nie
